# Supplementary material
Source: PubMed Central journal article supplement (PMC3070829)
Supplement: NIHMS266661-supplement-supplement_1.pdf [file NIHMS266661-supplement-supplement_1.pdf]

**Relationships among Environmental Exposures, Cord Blood Cytokine Responses, Allergy,  
and Wheeze at One Year of Age in an Inner-City Birth Cohort (URECA)**

**Online Repository**

**Authors**

Robert A. Wood, MD – Johns Hopkins University School of Medicine

Gordon R. Bloomberg, MD – Washington University School of Medicine

Meyer Kattan, MD – Columbia University College of Physicians and Surgeons

Kathleen Conroy, MD – Boston University School of Medicine

Megan T. Sandel, MD, MPH – Boston University School of Medicine

Amy Dresen – University of Wisconsin School of Medicine and Public Health

Peter J. Gergen, MD, MPH – Division of Allergy, Immunology, and Transplantation – NIH

Diane R. Gold, MD, MPH – Channing Laboratory, Brigham and Women's Hospital

John C. Schwarz, MS – Rho Federal Systems Division, Inc.

Cynthia M. Visness, PhD, MPH – Rho Federal Systems Division, Inc.

James E. Gern, MD – University of Wisconsin School of Medicine and Public Health

**Corresponding Author**

Robert Wood, MD

Johns Hopkins University School of Medicine

600 North Wolfe Street, CMSC 1102

Baltimore MD 21287

T: (410) 955-5883

F: (410) 955-0229

[rwood@jhmi.edu](mailto:rwood@jhmi.edu)

Table E1. Factor loadings for cytokine responses to innate and adaptive stimuli.

|                                | <u>Factor 1</u><br>IL-10/TNF- $\alpha$<br>response to<br>LPS/PG | <u>Factor 2</u><br>IL-12/ IFN- $\gamma$<br>response to<br>LPS/PG     | <u>Factor 3</u><br>IFN- $\alpha$<br>response to<br>LPS/PG | <u>Factor 4</u><br>IL-8 response<br>to innate<br>stimuli |
|--------------------------------|-----------------------------------------------------------------|----------------------------------------------------------------------|-----------------------------------------------------------|----------------------------------------------------------|
| <u>Model 1(innate stimuli)</u> |                                                                 |                                                                      |                                                           |                                                          |
| LPS-induced IL-10              | 54*                                                             | -7                                                                   | 7                                                         | 19                                                       |
| LPS-induced TNF- $\alpha$      | 48*                                                             | 6                                                                    | 9                                                         | 19                                                       |
| PG-induced IL-10               | 72*                                                             | -1                                                                   | -5                                                        | 16                                                       |
| PG-induced TNF- $\alpha$       | 45*                                                             | 10                                                                   | 4                                                         | 9                                                        |
| LPS-induced IFN- $\gamma$      | -2                                                              | 71*                                                                  | 1                                                         | 0                                                        |
| LPS-induced IL-12              | 39                                                              | 52*                                                                  | -7                                                        | 13                                                       |
| PG-induced IFN- $\gamma$       | 2                                                               | 70*                                                                  | -6                                                        | -8                                                       |
| PG-induced IL-12               | 62*                                                             | 48*                                                                  | -8                                                        | 7                                                        |
| LPS-induced IFN- $\alpha$      | 4                                                               | -3                                                                   | 85*                                                       | 4                                                        |
| PG-induced IFN- $\alpha$       | 5                                                               | -7                                                                   | 82*                                                       | -1                                                       |
| LPS-induced IL-8               | 25                                                              | 0                                                                    | 2                                                         | 79*                                                      |
| PG-induced IL-8                | 31                                                              | -1                                                                   | 2                                                         | 78*                                                      |
|                                | <u>Factor 5</u><br>Response to<br>PIC stimulant                 | <u>Factor 4<sup>†</sup></u><br>IL-8 response<br>to innate<br>stimuli | <u>Factor 6</u><br>Response to<br>CpG stimulant           | <u>Factor 7</u><br>Response to<br>RSV stimulant          |
| <u>Model 2(innate stimuli)</u> |                                                                 |                                                                      |                                                           |                                                          |
| PIC-induced IFN- $\alpha$      | 56*                                                             | 4                                                                    | 19                                                        | 4                                                        |
| PIC-induced IFN- $\gamma$      | 53*                                                             | -6                                                                   | 47*                                                       | 10                                                       |
| PIC-induced IL-10              | 64*                                                             | 13                                                                   | 12                                                        | -4                                                       |
| PIC-induced IL-12              | 65*                                                             | 23                                                                   | 15                                                        | -6                                                       |
| PIC-induced TNF- $\alpha$      | 46*                                                             | 37                                                                   | 34                                                        | 11                                                       |
| CpG-induced IL-8               | 13                                                              | 83*                                                                  | 2                                                         | 1                                                        |
| PIC-induced IL-8               | 9                                                               | 75*                                                                  | 15                                                        | -2                                                       |
| RSV-induced IL-8               | 22                                                              | 56*                                                                  | -7                                                        | 32                                                       |
| CpG-induced IFN- $\alpha$      | 21                                                              | 4                                                                    | 35                                                        | -4                                                       |
| CpG-induced IFN- $\gamma$      | 12                                                              | 6                                                                    | 72*                                                       | 14                                                       |
| CpG-induced IL-10              | 60*                                                             | 11                                                                   | 15                                                        | 9                                                        |
| CpG-induced IL-12              | 12                                                              | 4                                                                    | 43*                                                       | 3                                                        |

|                           |                 |                 |                  |                  |
|---------------------------|-----------------|-----------------|------------------|------------------|
| CpG-induced TNF- $\alpha$ | 32              | 36              | 44*              | 22               |
| RSV-induced IFN- $\alpha$ | -1              | 0               | 3                | 28               |
| RSV-induced IFN- $\gamma$ | -13             | -16             | 29               | 56*              |
| RSV-induced IL-10         | 33              | 11              | -26              | 34               |
| RSV-induced IL-12         | 31              | 13              | -10              | 64*              |
| RSV-induced TNF- $\alpha$ | -2              | 22              | 13               | 71*              |
|                           | <u>Factor 8</u> | <u>Factor 9</u> | <u>Factor 10</u> | <u>Factor 11</u> |
|                           | IFN- $\gamma$   | IL-10           | IL-13            | Response to      |
|                           | response to     | response to     | response to      | PHA              |
|                           | adaptive        | adaptive        | adaptive         | stimulant        |
|                           | stimuli         | stimuli         | stimuli          |                  |
| <u>Model 3(adaptive</u>   |                 |                 |                  |                  |
| CR-induced IFN- $\gamma$  | 70*             | 7               | 13               |                  |
| DM-induced IFN- $\gamma$  | 58*             | 11              | 44*              |                  |
| TT-induced IFN- $\gamma$  | 73*             | 5               | 22               |                  |
| CR-induced IL-10          | 16              | 56*             | 1                |                  |
| DM-induced IL-10          | 0               | 66*             | 18               |                  |
| TT-induced IL-10          | 0               | 75*             | -1               |                  |
| CR-induced IL-13          | 19              | 1               | 43*              |                  |
| DM-induced IL-13          | 9               | 8               | 55*              |                  |
| TT-induced IL-13          | 15              | 5               | 58*              |                  |
| PHA-induced IFN- $\gamma$ |                 |                 |                  | ‡                |
| PHA-induced IL-10         |                 |                 |                  | ‡                |
| PHA-induced IL-13         |                 |                 |                  | ‡                |

Factor loadings above 40 from varimax rotation are noted with an asterisk and serve to illustrate which stimulant-cytokine combinations cluster together. The colored boxes denote which responses were included in each of the 11 factors. Each cytokine response was re-scaled to a 0-5 scale (0=undetectable, 1-4=quartile of detectable responses across all stimulants). The re-scaled responses in each set of colored boxes were averaged to create the cytokine factor scores. Thus, each child gets a score for each factor that ranges from 0 to 5.

† The IL-8 factor score was combined across Model 1 and Model 2.

‡ Responses to PHA stimulant were highly correlated to one another and included by design as Factor 11.

Table E2. Associations between environmental factors\* and clinical outcomes.

|                                                         | Spearman correlation |         | Unadjusted Odds Ratio |         | Adjusted <sup>†</sup> Odds Ratio |         |
|---------------------------------------------------------|----------------------|---------|-----------------------|---------|----------------------------------|---------|
|                                                         | estimate             | p-value | OR                    | p-value | OR                               | p-value |
| <u>EASI score <math>\geq 1</math> at 3 or 12 months</u> |                      |         |                       |         |                                  |         |
| Bla g bed                                               | 0.03                 | 0.59    | 1.08                  | 0.60    | 1.34                             | 0.08    |
| Can f bed                                               | -0.05                | 0.35    | 0.90                  | 0.39    | 1.06                             | 0.67    |
| Cotinine level                                          | -0.06                | 0.23    | 0.82                  | 0.39    | 0.87                             | 0.59    |
| External Stress Index                                   | 0.10                 | 0.05    | 1.12                  | 0.06    | 1.07                             | 0.32    |
| Der p bed                                               | -0.04                | 0.43    | 0.90                  | 0.71    | 0.77                             | 0.42    |
| Mean EPDS score                                         | -0.01                | 0.83    | 1.03                  | 0.79    | 1.00                             | 0.97    |
| Ergosterol bed                                          | -0.01                | 0.92    | 1.03                  | 0.93    | 1.55                             | 0.26    |
| Ergosterol living room                                  | -0.05                | 0.44    | 0.84                  | 0.66    | 1.40                             | 0.46    |
| Fel d bed                                               | 0.03                 | 0.52    | 1.05                  | 0.63    | 0.83                             | 0.12    |
| Maternal smoking                                        | -0.06                | 0.26    | 0.96                  | 0.24    | 0.97                             | 0.47    |
| Mus m bed                                               | -0.06                | 0.27    | 0.96                  | 0.29    | 0.96                             | 0.39    |
| Mean PSS score                                          | -0.06                | 0.27    | 0.81                  | 0.29    | 0.83                             | 0.39    |
| Endotoxin bed                                           | -0.03                | 0.54    | 0.90                  | 0.63    | 1.09                             | 0.71    |
| <u>Any IgE <math>\geq 0.35</math> kUA/L</u>             |                      |         |                       |         |                                  |         |
| Bla g bed                                               | -0.01                | 0.92    | 1.01                  | 0.96    | 1.07                             | 0.70    |
| Can f bed                                               | -0.01                | 0.93    | 0.97                  | 0.81    | 0.96                             | 0.79    |
| Cotinine level                                          | -0.06                | 0.25    | 0.79                  | 0.32    | 0.81                             | 0.38    |
| External Stress Index                                   | -0.05                | 0.36    | 0.94                  | 0.33    | 0.92                             | 0.20    |
| Der p bed                                               | -0.05                | 0.40    | 0.96                  | 0.88    | 0.94                             | 0.83    |
| Mean EPDS score                                         | -0.10                | 0.06    | 0.81                  | 0.06    | 0.80                             | 0.05    |
| Ergosterol bed                                          | -0.01                | 0.91    | 0.95                  | 0.88    | 0.95                             | 0.89    |
| Ergosterol living room                                  | -0.09                | 0.17    | 0.52                  | 0.12    | 0.49                             | 0.13    |
| Fel d bed                                               | -0.03                | 0.57    | 0.95                  | 0.60    | 0.93                             | 0.51    |
| Maternal smoking                                        | -0.08                | 0.13    | 0.70                  | 0.13    | 0.72                             | 0.16    |
| Mus m bed                                               | -0.12                | 0.04    | 0.78                  | 0.04    | 0.76                             | 0.05    |
| Mean PSS score                                          | -0.10                | 0.05    | 0.68                  | 0.07    | 0.66                             | 0.06    |
| Endotoxin bed                                           | -0.06                | 0.31    | 0.72                  | 0.17    | 0.72                             | 0.19    |
| <u>Single Wheeze</u>                                    |                      |         |                       |         |                                  |         |
| Bla g bed                                               | -0.13                | 0.01    | 0.73                  | 0.03    | 0.73                             | 0.06    |
| Can f bed                                               | 0.01                 | 0.90    | 1.03                  | 0.79    | 1.03                             | 0.81    |
| Cotinine level                                          | -0.05                | 0.33    | 0.90                  | 0.64    | 0.86                             | 0.53    |
| External Stress Index                                   | 0.03                 | 0.52    | 1.03                  | 0.59    | 1.04                             | 0.51    |
| Der p bed                                               | 0.04                 | 0.49    | 1.12                  | 0.68    | 0.93                             | 0.80    |
| Mean EPDS score                                         | 0.05                 | 0.31    | 1.09                  | 0.40    | 1.03                             | 0.75    |

|                        |       |       |      |       |      |       |
|------------------------|-------|-------|------|-------|------|-------|
| Ergosterol bed         | 0.04  | 0.50  | 1.25 | 0.53  | 1.20 | 0.62  |
| Ergosterol living room | 0.03  | 0.68  | 1.33 | 0.48  | 0.95 | 0.91  |
| Fel d bed              | -0.14 | 0.01  | 0.79 | 0.02  | 0.83 | 0.10  |
| Maternal smoking       | 0.03  | 0.53  | 1.15 | 0.53  | 1.15 | 0.54  |
| Mus m bed              | -0.16 | <0.01 | 0.68 | <0.01 | 0.72 | 0.02  |
| Mean PSS score         | 0.12  | 0.02  | 1.60 | 0.01  | 1.54 | 0.03  |
| Endotoxin bed          | -0.07 | 0.23  | 0.77 | 0.25  | 0.75 | 0.23  |
| <u>Multiple Wheeze</u> |       |       |      |       |      |       |
| Bla g bed              | 0.00  | 1.00  | 1.01 | 0.96  | 1.17 | 0.29  |
| Can f bed              | 0.01  | 0.79  | 1.03 | 0.82  | 1.05 | 0.71  |
| Cotinine level         | 0.12  | 0.01  | 1.63 | 0.01  | 1.56 | 0.02  |
| External Stress Index  | 0.06  | 0.20  | 1.08 | 0.19  | 1.11 | 0.10  |
| Der p bed              | 0.10  | 0.04  | 1.64 | 0.03  | 1.41 | 0.15  |
| Mean EPDS score        | 0.16  | <0.01 | 1.38 | <0.01 | 1.37 | <0.01 |
| Ergosterol bed         | 0.08  | 0.09  | 1.93 | 0.06  | 1.61 | 0.20  |
| Ergosterol living room | 0.12  | 0.03  | 2.44 | 0.03  | 1.58 | 0.31  |
| Fel d bed              | 0.01  | 0.86  | 1.01 | 0.96  | 1.05 | 0.67  |
| Maternal smoking       | 0.06  | 0.18  | 1.33 | 0.18  | 1.21 | 0.38  |
| Mus m bed              | -0.01 | 0.90  | 0.98 | 0.86  | 1.05 | 0.67  |
| Mean PSS score         | 0.12  | 0.01  | 1.63 | 0.01  | 1.59 | 0.01  |
| Endotoxin bed          | 0.08  | 0.10  | 1.44 | 0.08  | 1.33 | 0.20  |

\* The following environmental variables were log-transformed: bla g, can f, cotinine, der p, ergosterol, fel d, mus m, and endotoxin.

† These models have been adjusted for study site, birth season of the child, and sex of the child.

Table E3. Associations between cord blood cytokine responses and clinical outcomes

|                                                         | Spearman correlation |         | Unadjusted Odds Ratio |         | Adjusted* Odds Ratio |         |
|---------------------------------------------------------|----------------------|---------|-----------------------|---------|----------------------|---------|
|                                                         | estimate             | p-value | OR                    | p-value | OR                   | p-value |
| <u>EASI score <math>\geq 1</math> at 3 or 12 months</u> |                      |         |                       |         |                      |         |
| IFN- $\gamma$ response to adaptive stimuli              | -0.10                | 0.06    | 0.54                  | 0.03    | 0.49                 | 0.04    |
| IL-10 response to adaptive stimuli                      | -0.13                | 0.02    | 0.49                  | 0.08    | 0.52                 | 0.12    |
| IL-13 response to adaptive stimuli                      | -0.04                | 0.43    | 0.63                  | 0.27    | 0.63                 | 0.29    |
| IFN- $\alpha$ response to LPS/PG                        | 0.00                 | 0.98    | 1.02                  | 0.87    | 1.09                 | 0.56    |
| IL-10/TNF- $\alpha$ response to LPS/PG                  | -0.09                | 0.08    | 0.62                  | 0.04    | 0.50                 | 0.01    |
| IL-12/ IFN- $\gamma$ response to LPS/PG                 | -0.05                | 0.36    | 0.75                  | 0.16    | 0.61                 | 0.02    |
| IL-8 response to any stimuli                            | -0.02                | 0.66    | 0.91                  | 0.58    | 0.79                 | 0.20    |
| Response to PHA stimulant                               | -0.22                | <0.01   | 0.40                  | <0.01   | 0.54                 | 0.02    |
| Response to CpG stimulant                               | -0.10                | 0.06    | 0.70                  | 0.08    | 0.75                 | 0.19    |
| Response to PIC stimulant                               | -0.11                | 0.02    | 0.67                  | 0.03    | 0.65                 | 0.04    |
| Response to RSV stimulant                               | 0.06                 | 0.25    | 1.34                  | 0.22    | 0.95                 | 0.84    |
| <u>Any IgE <math>\geq 0.35</math> kUA/L</u>             |                      |         |                       |         |                      |         |
| IFN- $\gamma$ response to adaptive stimuli              | -0.04                | 0.54    | 0.71                  | 0.24    | 0.63                 | 0.16    |
| IL-10 response to adaptive stimuli                      | -0.08                | 0.19    | 0.58                  | 0.20    | 0.57                 | 0.18    |
| IL-13 response to adaptive stimuli                      | -0.09                | 0.13    | 0.47                  | 0.09    | 0.43                 | 0.06    |
| IFN- $\alpha$ response to LPS/PG                        | 0.03                 | 0.59    | 1.11                  | 0.44    | 1.13                 | 0.41    |
| IL-10/TNF- $\alpha$ response to LPS/PG                  | -0.03                | 0.60    | 0.84                  | 0.47    | 0.89                 | 0.64    |
| IL-12/ IFN- $\gamma$ response to LPS/PG                 | -0.01                | 0.88    | 0.94                  | 0.75    | 0.90                 | 0.61    |
| IL-8 response to any stimuli                            | -0.02                | 0.74    | 0.93                  | 0.68    | 0.90                 | 0.55    |
| Response to PHA stimulant                               | -0.03                | 0.60    | 0.90                  | 0.66    | 0.95                 | 0.84    |
| Response to CpG stimulant                               | -0.02                | 0.68    | 0.95                  | 0.79    | 0.98                 | 0.93    |
| Response to PIC stimulant                               | -0.04                | 0.43    | 0.86                  | 0.45    | 0.90                 | 0.61    |
| Response to RSV stimulant                               | -0.02                | 0.73    | 0.90                  | 0.64    | 0.95                 | 0.84    |
| <u>Single Wheeze</u>                                    |                      |         |                       |         |                      |         |
| IFN- $\gamma$ response to adaptive stimuli              | -0.02                | 0.74    | 0.84                  | 0.45    | 0.87                 | 0.58    |
| IL-10 response to adaptive stimuli                      | -0.05                | 0.38    | 0.70                  | 0.29    | 0.79                 | 0.50    |
| IL-13 response to adaptive stimuli                      | -0.04                | 0.47    | 0.65                  | 0.25    | 0.78                 | 0.54    |
| IFN- $\alpha$ response to LPS/PG                        | -0.02                | 0.69    | 0.95                  | 0.66    | 0.88                 | 0.36    |
| IL-10/TNF- $\alpha$ response to LPS/PG                  | -0.11                | 0.04    | 0.52                  | 0.01    | 0.58                 | 0.05    |
| IL-12/ IFN- $\gamma$ response to LPS/PG                 | 0.00                 | 0.99    | 0.99                  | 0.96    | 1.07                 | 0.74    |
| IL-8 response to any stimuli                            | 0.03                 | 0.58    | 1.12                  | 0.48    | 1.23                 | 0.23    |
| Response to PHA stimulant                               | -0.06                | 0.21    | 0.70                  | 0.09    | 0.65                 | 0.06    |
| Response to CpG stimulant                               | -0.06                | 0.26    | 0.77                  | 0.20    | 0.83                 | 0.39    |
| Response to PIC stimulant                               | -0.02                | 0.65    | 0.89                  | 0.48    | 1.01                 | 0.97    |
| Response to RSV stimulant                               | -0.09                | 0.09    | 0.75                  | 0.17    | 0.86                 | 0.51    |

Multiple Wheeze

|                                            |       |      |      |      |      |      |
|--------------------------------------------|-------|------|------|------|------|------|
| IFN- $\gamma$ response to adaptive stimuli | -0.06 | 0.20 | 0.82 | 0.39 | 1.09 | 0.74 |
| IL-10 response to adaptive stimuli         | -0.02 | 0.73 | 0.78 | 0.49 | 0.88 | 0.74 |
| IL-13 response to adaptive stimuli         | -0.01 | 0.87 | 0.89 | 0.75 | 1.15 | 0.73 |
| IFN- $\alpha$ response to LPS/PG           | -0.02 | 0.59 | 0.96 | 0.75 | 1.09 | 0.54 |
| IL-10/TNF- $\alpha$ response to LPS/PG     | 0.02  | 0.71 | 0.81 | 0.35 | 0.74 | 0.21 |
| IL-12/ IFN- $\gamma$ response to LPS/PG    | -0.05 | 0.24 | 0.86 | 0.40 | 0.93 | 0.70 |
| IL-8 response to any stimuli               | -0.01 | 0.75 | 0.92 | 0.61 | 1.00 | 0.98 |
| Response to PHA stimulant                  | 0.01  | 0.87 | 1.04 | 0.85 | 1.01 | 0.95 |
| Response to CpG stimulant                  | 0.06  | 0.16 | 1.32 | 0.15 | 1.31 | 0.18 |
| Response to PIC stimulant                  | 0.02  | 0.62 | 1.09 | 0.63 | 1.06 | 0.74 |
| Response to RSV stimulant                  | 0.00  | 0.97 | 1.04 | 0.85 | 0.92 | 0.71 |

\* These models have been adjusted for study site, birth season of the child, and sex of the child.

Table E4. Associations between environmental factors\* and cytokine responses.

|                                                             | Spearman<br>Correlation |         | Unadjusted<br>Model <sup>†</sup> |         | Adjusted<br>Model <sup>‡</sup> |         |
|-------------------------------------------------------------|-------------------------|---------|----------------------------------|---------|--------------------------------|---------|
|                                                             | estimate                | p-value | estimate                         | p-value | estimate                       | p-value |
| <u>IFN-<math>\gamma</math> response to adaptive stimuli</u> |                         |         |                                  |         |                                |         |
| Bla g bed                                                   | 0.02                    | 0.72    | 0.01                             | 0.86    | 0.01                           | 0.73    |
| Can f bed                                                   | -0.07                   | 0.19    | -0.05                            | 0.10    | -0.05                          | 0.10    |
| Cotinine level                                              | 0.02                    | 0.66    | 0.00                             | 0.94    | 0.01                           | 0.82    |
| External Stress Index                                       | -0.06                   | 0.23    | -0.02                            | 0.12    | -0.01                          | 0.35    |
| Der p bed                                                   | -0.06                   | 0.27    | -0.02                            | 0.76    | 0.02                           | 0.74    |
| Mean EPDS score                                             | -0.02                   | 0.72    | -0.01                            | 0.73    | 0.01                           | 0.66    |
| Ergosterol bed                                              | 0.12                    | 0.03    | 0.21                             | 0.01    | 0.22                           | 0.01    |
| Ergosterol living room                                      | 0.00                    | 0.99    | -0.03                            | 0.75    | 0.07                           | 0.47    |
| Fel d bed                                                   | -0.05                   | 0.33    | -0.02                            | 0.36    | 0.01                           | 0.77    |
| Maternal smoking                                            | -0.02                   | 0.63    | -0.05                            | 0.35    | -0.04                          | 0.41    |
| Mus m bed                                                   | -0.05                   | 0.33    | -0.02                            | 0.49    | -0.01                          | 0.85    |
| Mean PSS score                                              | -0.03                   | 0.58    | -0.03                            | 0.51    | 0.00                           | 0.94    |
| Endotoxin bed                                               | -0.04                   | 0.42    | -0.04                            | 0.50    | 0.00                           | 0.99    |
| <u>IL-10 response to adaptive stimuli</u>                   |                         |         |                                  |         |                                |         |
| Bla g bed                                                   | -0.03                   | 0.63    | -0.01                            | 0.51    | -0.01                          | 0.65    |
| Can f bed                                                   | -0.05                   | 0.39    | -0.02                            | 0.21    | -0.03                          | 0.12    |
| Cotinine level                                              | 0.00                    | 0.95    | -0.01                            | 0.84    | -0.01                          | 0.76    |
| External Stress Index                                       | 0.00                    | 0.94    | 0.00                             | 0.94    | 0.00                           | 0.70    |
| Der p bed                                                   | -0.04                   | 0.43    | -0.04                            | 0.29    | -0.02                          | 0.62    |
| Mean EPDS score                                             | 0.03                    | 0.50    | 0.00                             | 0.79    | 0.01                           | 0.53    |
| Ergosterol bed                                              | -0.02                   | 0.67    | -0.03                            | 0.48    | -0.04                          | 0.41    |
| Ergosterol living room                                      | 0.03                    | 0.62    | 0.01                             | 0.92    | 0.03                           | 0.65    |
| Fel d bed                                                   | -0.01                   | 0.91    | 0.01                             | 0.53    | 0.01                           | 0.58    |
| Maternal smoking                                            | 0.07                    | 0.15    | 0.02                             | 0.58    | 0.02                           | 0.61    |
| Mus m bed                                                   | -0.01                   | 0.88    | -0.01                            | 0.68    | -0.01                          | 0.43    |
| Mean PSS score                                              | 0.01                    | 0.77    | 0.00                             | 0.91    | 0.00                           | 0.96    |
| Endotoxin bed                                               | -0.04                   | 0.44    | -0.02                            | 0.63    | -0.01                          | 0.68    |
| <u>IL-13 response to adaptive stimuli</u>                   |                         |         |                                  |         |                                |         |
| Bla g bed                                                   | 0.01                    | 0.79    | 0.01                             | 0.77    | 0.00                           | 0.98    |
| Can f bed                                                   | 0.01                    | 0.88    | -0.01                            | 0.63    | -0.02                          | 0.39    |
| Cotinine level                                              | 0.00                    | 0.95    | 0.00                             | 0.97    | 0.00                           | 0.89    |
| External Stress Index                                       | 0.01                    | 0.89    | 0.00                             | 0.83    | 0.00                           | 0.95    |
| Der p bed                                                   | -0.01                   | 0.81    | -0.01                            | 0.83    | 0.03                           | 0.47    |
| Mean EPDS score                                             | 0.00                    | 0.93    | 0.01                             | 0.54    | 0.01                           | 0.30    |
| Ergosterol bed                                              | 0.00                    | 0.94    | 0.00                             | 0.95    | 0.02                           | 0.71    |



|                        |       |      |       |      |       |      |
|------------------------|-------|------|-------|------|-------|------|
| Ergosterol living room | -0.03 | 0.68 | -0.01 | 0.90 | 0.06  | 0.33 |
| Fel d bed              | 0.10  | 0.04 | 0.03  | 0.04 | 0.03  | 0.06 |
| Maternal smoking       | 0.04  | 0.36 | 0.02  | 0.45 | 0.02  | 0.42 |
| Mus m bed              | 0.00  | 1.00 | 0.01  | 0.48 | 0.00  | 0.95 |
| Mean PSS score         | 0.00  | 0.92 | 0.00  | 0.85 | 0.01  | 0.69 |
| Endotoxin bed          | -0.05 | 0.36 | -0.04 | 0.24 | -0.04 | 0.25 |

IFN- $\alpha$  response to LPS/PG

|                        |       |      |       |      |       |      |
|------------------------|-------|------|-------|------|-------|------|
| Bla g bed              | -0.07 | 0.17 | -0.05 | 0.32 | -0.02 | 0.66 |
| Can f bed              | 0.03  | 0.57 | 0.03  | 0.44 | 0.05  | 0.24 |
| Cotinine level         | -0.02 | 0.66 | -0.01 | 0.89 | 0.02  | 0.74 |
| External Stress Index  | -0.06 | 0.18 | -0.02 | 0.22 | 0.00  | 0.94 |
| Der p bed              | -0.04 | 0.38 | -0.05 | 0.61 | 0.00  | 0.97 |
| Mean EPDS score        | 0.03  | 0.58 | 0.03  | 0.29 | 0.05  | 0.10 |
| Ergosterol bed         | -0.09 | 0.06 | -0.20 | 0.09 | -0.11 | 0.34 |
| Ergosterol living room | -0.01 | 0.80 | -0.04 | 0.78 | 0.12  | 0.37 |
| Fel d bed              | 0.00  | 0.97 | 0.00  | 0.96 | 0.04  | 0.23 |
| Maternal smoking       | 0.05  | 0.24 | 0.11  | 0.13 | 0.13  | 0.06 |
| Mus m bed              | -0.01 | 0.91 | -0.01 | 0.84 | -0.01 | 0.76 |
| Mean PSS score         | 0.01  | 0.77 | 0.04  | 0.53 | 0.07  | 0.26 |
| Endotoxin bed          | -0.05 | 0.28 | -0.12 | 0.11 | -0.04 | 0.57 |

IL-10/TNF- $\alpha$  response to LPS/PG

|                        |       |      |       |      |       |      |
|------------------------|-------|------|-------|------|-------|------|
| Bla g bed              | -0.07 | 0.16 | -0.05 | 0.08 | -0.04 | 0.13 |
| Can f bed              | -0.04 | 0.36 | -0.02 | 0.30 | -0.01 | 0.60 |
| Cotinine level         | -0.03 | 0.51 | -0.01 | 0.78 | 0.00  | 0.96 |
| External Stress Index  | 0.01  | 0.79 | -0.01 | 0.32 | -0.01 | 0.45 |
| Der p bed              | 0.06  | 0.24 | 0.06  | 0.21 | 0.05  | 0.27 |
| Mean EPDS score        | 0.01  | 0.77 | -0.01 | 0.71 | -0.01 | 0.74 |
| Ergosterol bed         | -0.09 | 0.08 | -0.09 | 0.19 | -0.07 | 0.33 |
| Ergosterol living room | 0.06  | 0.33 | 0.08  | 0.28 | 0.12  | 0.15 |
| Fel d bed              | 0.11  | 0.02 | 0.03  | 0.11 | 0.02  | 0.23 |
| Maternal smoking       | 0.05  | 0.23 | 0.02  | 0.63 | 0.01  | 0.82 |
| Mus m bed              | 0.07  | 0.13 | 0.03  | 0.18 | 0.01  | 0.72 |
| Mean PSS score         | -0.01 | 0.74 | -0.04 | 0.26 | -0.03 | 0.33 |
| Endotoxin bed          | -0.07 | 0.16 | -0.09 | 0.03 | -0.09 | 0.03 |

IL-12/ IFN- $\gamma$  response to LPS/PG

|                       |       |      |       |      |       |      |
|-----------------------|-------|------|-------|------|-------|------|
| Bla g bed             | 0.03  | 0.48 | 0.02  | 0.56 | 0.00  | 0.91 |
| Can f bed             | 0.01  | 0.87 | 0.01  | 0.71 | 0.00  | 0.96 |
| Cotinine level        | -0.04 | 0.35 | -0.05 | 0.31 | -0.04 | 0.41 |
| External Stress Index | 0.03  | 0.45 | 0.01  | 0.48 | 0.00  | 0.89 |
| Der p bed             | 0.01  | 0.82 | 0.01  | 0.92 | 0.04  | 0.52 |

|                        |       |      |       |      |       |      |
|------------------------|-------|------|-------|------|-------|------|
| Mean EPDS score        | -0.01 | 0.87 | 0.01  | 0.62 | 0.01  | 0.56 |
| Ergosterol bed         | -0.07 | 0.19 | -0.12 | 0.19 | -0.08 | 0.41 |
| Ergosterol living room | 0.03  | 0.62 | 0.06  | 0.52 | 0.20  | 0.07 |
| Fel d bed              | 0.09  | 0.06 | 0.06  | 0.01 | 0.04  | 0.13 |
| Maternal smoking       | -0.04 | 0.33 | -0.07 | 0.20 | -0.05 | 0.40 |
| Mus m bed              | 0.09  | 0.06 | 0.04  | 0.21 | 0.02  | 0.45 |
| Mean PSS score         | 0.01  | 0.84 | -0.01 | 0.90 | 0.00  | 0.99 |
| Endotoxin bed          | 0.02  | 0.63 | 0.00  | 0.97 | 0.01  | 0.92 |

IL-8 response to any stimuli

|                        |       |      |       |      |       |      |
|------------------------|-------|------|-------|------|-------|------|
| Bla g bed              | -0.07 | 0.14 | -0.07 | 0.07 | -0.06 | 0.16 |
| Can f bed              | -0.05 | 0.26 | -0.03 | 0.31 | -0.04 | 0.29 |
| Cotinine level         | -0.08 | 0.07 | -0.07 | 0.24 | -0.06 | 0.28 |
| External Stress Index  | 0.04  | 0.33 | 0.02  | 0.23 | 0.01  | 0.75 |
| Der p bed              | 0.00  | 0.97 | -0.04 | 0.57 | -0.01 | 0.88 |
| Mean EPDS score        | 0.03  | 0.58 | -0.01 | 0.82 | -0.01 | 0.81 |
| Ergosterol bed         | -0.11 | 0.02 | -0.26 | 0.01 | -0.20 | 0.05 |
| Ergosterol living room | -0.09 | 0.11 | -0.19 | 0.09 | -0.04 | 0.75 |
| Fel d bed              | 0.06  | 0.20 | 0.04  | 0.17 | 0.02  | 0.59 |
| Maternal smoking       | -0.02 | 0.71 | -0.02 | 0.75 | 0.00  | 1.00 |
| Mus m bed              | 0.13  | 0.01 | 0.06  | 0.04 | 0.05  | 0.11 |
| Mean PSS score         | 0.02  | 0.67 | 0.02  | 0.76 | 0.01  | 0.77 |
| Endotoxin bed          | -0.09 | 0.06 | -0.15 | 0.02 | -0.13 | 0.04 |

Response to PHA stimulant

|                        |       |       |       |      |       |      |
|------------------------|-------|-------|-------|------|-------|------|
| Bla g bed              | 0.06  | 0.22  | 0.02  | 0.39 | -0.01 | 0.75 |
| Can f bed              | 0.02  | 0.72  | 0.01  | 0.59 | 0.00  | 0.87 |
| Cotinine level         | -0.02 | 0.74  | 0.01  | 0.87 | 0.00  | 0.97 |
| External Stress Index  | -0.06 | 0.19  | -0.02 | 0.08 | -0.01 | 0.56 |
| Der p bed              | -0.01 | 0.83  | 0.03  | 0.62 | 0.04  | 0.45 |
| Mean EPDS score        | -0.01 | 0.91  | -0.01 | 0.56 | 0.00  | 0.86 |
| Ergosterol bed         | -0.01 | 0.90  | -0.02 | 0.79 | -0.09 | 0.22 |
| Ergosterol living room | 0.16  | <0.01 | 0.18  | 0.02 | 0.10  | 0.22 |
| Fel d bed              | -0.03 | 0.51  | -0.02 | 0.31 | 0.01  | 0.60 |
| Maternal smoking       | -0.03 | 0.43  | -0.04 | 0.33 | -0.06 | 0.17 |
| Mus m bed              | -0.03 | 0.48  | -0.01 | 0.82 | 0.01  | 0.61 |
| Mean PSS score         | -0.02 | 0.60  | -0.01 | 0.70 | -0.01 | 0.69 |
| Endotoxin bed          | 0.00  | 0.97  | 0.00  | 0.96 | -0.04 | 0.32 |

Response to CpG stimulant

|                |       |      |       |      |       |      |
|----------------|-------|------|-------|------|-------|------|
| Bla g bed      | 0.01  | 0.91 | -0.01 | 0.75 | -0.03 | 0.47 |
| Can f bed      | 0.05  | 0.31 | 0.02  | 0.54 | 0.01  | 0.64 |
| Cotinine level | -0.06 | 0.22 | -0.04 | 0.40 | -0.04 | 0.38 |

|                        |       |      |       |      |       |      |
|------------------------|-------|------|-------|------|-------|------|
| External Stress Index  | 0.00  | 0.97 | 0.00  | 0.81 | 0.01  | 0.50 |
| Der p bed              | 0.04  | 0.35 | 0.02  | 0.75 | 0.03  | 0.65 |
| Mean EPDS score        | 0.03  | 0.47 | 0.02  | 0.42 | 0.02  | 0.38 |
| Ergosterol bed         | 0.01  | 0.83 | 0.04  | 0.62 | 0.06  | 0.49 |
| Ergosterol living room | 0.14  | 0.02 | 0.16  | 0.07 | 0.22  | 0.03 |
| Fel d bed              | -0.02 | 0.63 | 0.01  | 0.80 | 0.01  | 0.67 |
| Maternal smoking       | -0.05 | 0.30 | -0.05 | 0.32 | -0.06 | 0.22 |
| Mus m bed              | 0.06  | 0.19 | 0.03  | 0.28 | 0.02  | 0.41 |
| Mean PSS score         | -0.03 | 0.55 | -0.02 | 0.72 | -0.01 | 0.73 |
| Endotoxin bed          | 0.00  | 0.94 | -0.02 | 0.64 | -0.04 | 0.51 |

Response to PIC stimulant

|                        |       |      |       |      |       |      |
|------------------------|-------|------|-------|------|-------|------|
| Bla g bed              | -0.04 | 0.46 | -0.02 | 0.54 | -0.04 | 0.30 |
| Can f bed              | 0.01  | 0.77 | 0.01  | 0.70 | 0.01  | 0.73 |
| Cotinine level         | -0.03 | 0.50 | -0.03 | 0.64 | -0.04 | 0.50 |
| External Stress Index  | 0.00  | 0.96 | 0.00  | 0.98 | 0.01  | 0.64 |
| Der p bed              | 0.00  | 0.99 | -0.05 | 0.48 | -0.02 | 0.72 |
| Mean EPDS score        | -0.06 | 0.17 | -0.02 | 0.30 | -0.02 | 0.48 |
| Ergosterol bed         | 0.04  | 0.46 | 0.04  | 0.67 | 0.03  | 0.76 |
| Ergosterol living room | 0.04  | 0.50 | 0.07  | 0.50 | 0.08  | 0.47 |
| Fel d bed              | 0.08  | 0.09 | 0.04  | 0.12 | 0.04  | 0.19 |
| Maternal smoking       | -0.02 | 0.61 | -0.02 | 0.69 | -0.04 | 0.46 |
| Mus m bed              | 0.02  | 0.68 | 0.02  | 0.46 | 0.00  | 0.92 |
| Mean PSS score         | -0.04 | 0.36 | -0.04 | 0.44 | -0.03 | 0.49 |
| Endotoxin bed          | -0.04 | 0.39 | -0.06 | 0.25 | -0.10 | 0.07 |

Response to RSV stimulant

|                        |       |       |       |       |       |      |
|------------------------|-------|-------|-------|-------|-------|------|
| Bla g bed              | -0.08 | 0.13  | -0.06 | 0.04  | -0.04 | 0.25 |
| Can f bed              | -0.15 | <0.01 | -0.10 | <0.01 | -0.06 | 0.01 |
| Cotinine level         | -0.06 | 0.18  | -0.07 | 0.15  | -0.05 | 0.25 |
| External Stress Index  | -0.01 | 0.91  | -0.01 | 0.62  | 0.00  | 0.99 |
| Der p bed              | 0.06  | 0.19  | 0.08  | 0.14  | 0.08  | 0.12 |
| Mean EPDS score        | -0.02 | 0.71  | 0.01  | 0.62  | 0.01  | 0.63 |
| Ergosterol bed         | -0.05 | 0.37  | -0.04 | 0.63  | 0.02  | 0.82 |
| Ergosterol living room | 0.03  | 0.60  | 0.09  | 0.26  | 0.18  | 0.03 |
| Fel d bed              | 0.06  | 0.19  | 0.02  | 0.25  | 0.01  | 0.56 |
| Maternal smoking       | 0.03  | 0.58  | 0.02  | 0.66  | 0.00  | 0.99 |
| Mus m bed              | 0.14  | <0.01 | 0.06  | 0.01  | 0.01  | 0.62 |
| Mean PSS score         | -0.04 | 0.35  | -0.02 | 0.62  | -0.01 | 0.85 |
| Endotoxin bed          | -0.07 | 0.19  | -0.04 | 0.39  | -0.03 | 0.56 |

\* The following environmental variables were log-transformed: bla g, can f, cotinine, der p, ergosterol, fel d, mus m, and endotoxin.

<sup>†</sup> Parameter estimates indicate the change in cytokine response for a 1-unit change in the predictor.

<sup>‡</sup> Parameter estimates indicate the change in cytokine response for a 1-unit change in the predictor while adjusting for study site, birth season of the child, and sex of the child.
